# Supplementary material for: PDGFRα+ stromal adipocyte progenitors transition into epithelial cells during lobulo-alveologenesis in the murine mammary gland
Source: PubMed Central journal article supplement (PMC6465250; doi:10.1038/s41467-019-09748-z), 2019-04-15
Supplement: 41467_2019_9748_MOESM9_ESM.pdf [file 41467_2019_9748_MOESM9_ESM.pdf]

Editorial Note: This manuscript has been previously reviewed at another journal that is not operating a transparent peer review scheme. The manuscript was considered suitable for publication without further review at Nature Communications.
