# Supplementary material for: PDGFRα+ stromal adipocyte progenitors transition into epithelial cells during lobulo-alveologenesis in the murine mammary gland
Source: Nat Commun. 2019 Apr 15;10:1760. doi: 10.1038/s41467-019-09748-z (PMC6465250; doi:10.1038/s41467-019-09748-z)
Supplement: Supplementary file 1 — Supplementary Information [file 41467_2019_9748_MOESM1_ESM.pdf]

**PDGFR $\alpha$ <sup>+</sup> mesenchymal adipocyte progenitors are a source of epithelial cells in  
the murine mammary gland**

Joshi et al.

**Supplementary Information**

(Supplementary Figures 1-8 and Table 1)

# Joshi et al Supplementary Figure 1

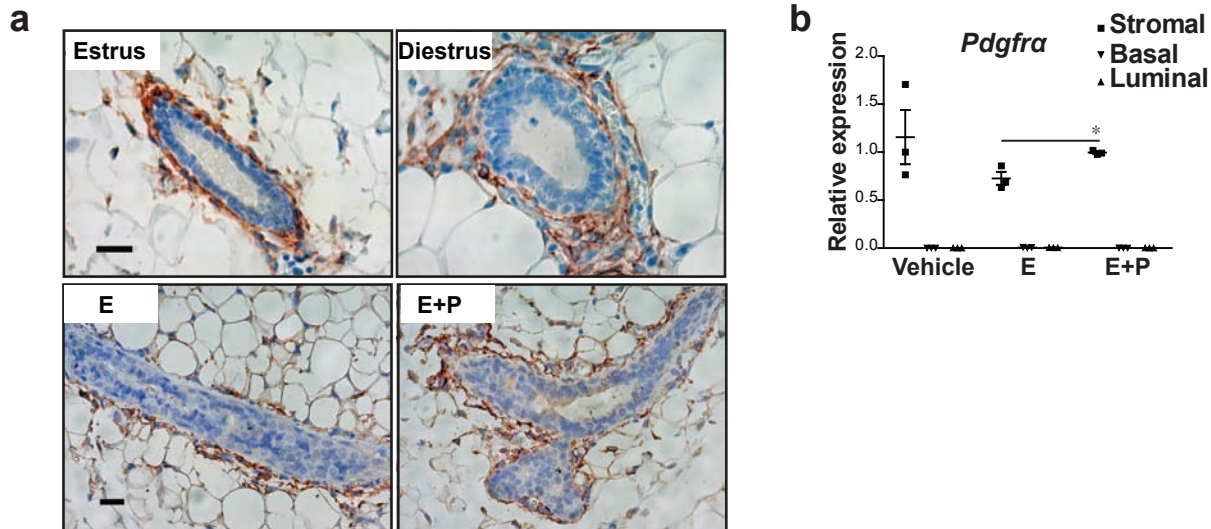

**Pattern of PDGFR $\alpha$  expression in the adult mouse mammary gland.** (a) Immunohistochemistry for PDGFR $\alpha$  during the estrous cycle (top panels) and hormone treatment with estrogen (E) or estrogen+progesterone (E+P) (bottom panels); scale bar = 20  $\mu$ m. (b) Stromal (CD49<sup>f</sup>EpCAM<sup>-</sup>) and luminal (CD49<sup>lo</sup>EpCAM<sup>+</sup>), basal (CD49<sup>hi</sup>EpCAM<sup>+</sup>) mammary epithelial cells were FACS-purified from ovariectomized mice treated with vehicle, estrogen (E) or estrogen+progesterone (E+P) and analyzed by qRT-PCR for *Pdgfra* relative to  $\beta$ -actin (n = 3 mice per group). Data represent mean  $\pm$  s.e.m. \*p < 0.05 (one-way ANOVA). Source data are provided as a Source Data file.

# Joshi et al Supplementary Figure 2

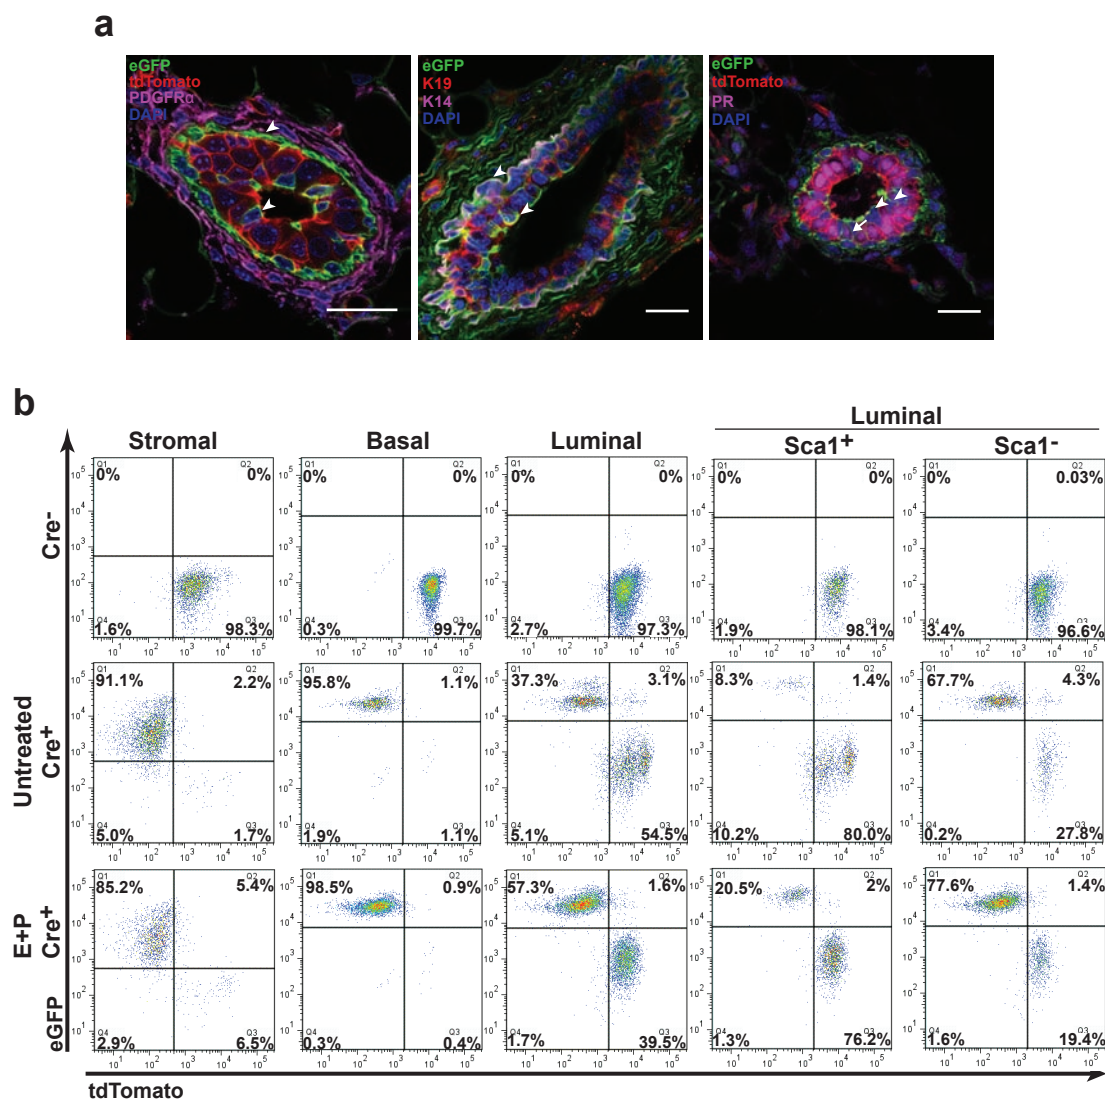

**Adult *Pdgfra*Cre *R26mTmG* mammary epithelium exhibits GFP<sup>+</sup> cells.** (a) GFP<sup>+</sup> cells with PDGFRα (left), basal (K14) and luminal (K19)-specific epithelial markers (middle) and progesterone receptor (PR; right) in mammary tissue sections from untreated mice (representative of n = 3 mice and 5 fields per tissue section); scale bar = 25 μm. White arrowheads indicate GFP<sup>+</sup> cells that are either K14<sup>+</sup>, K19<sup>+</sup> or PR<sup>+</sup> and arrow indicates a GFP<sup>+</sup> PR<sup>+</sup> cell. (b) Representative FACS plots of GFP<sup>+</sup> and tdTomato<sup>+</sup> cells in mammary subsets of adult glands isolated from untreated (n = 3) or E+P treated (n = 2) mice.

# Joshi et al Supplementary Figure 3

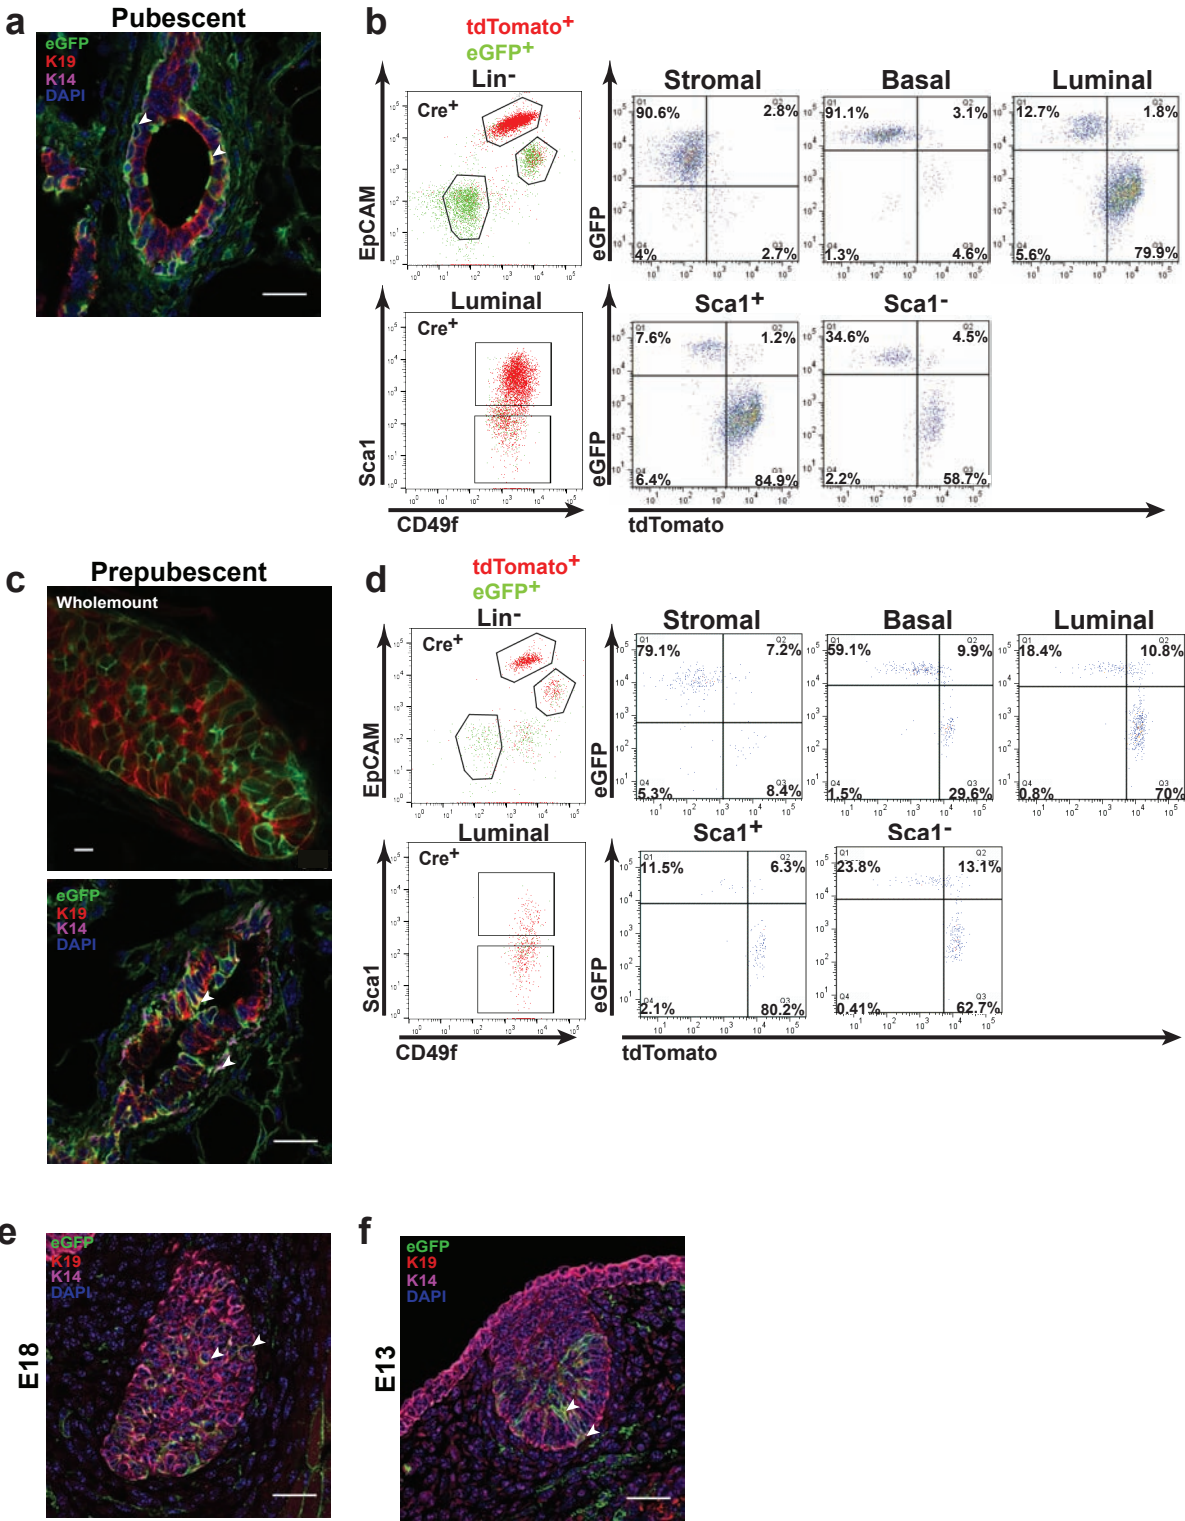

**GFP progeny from *Pdgfra*<sup>+</sup> cell tracing are found within mammary epithelial subsets during early development.**  
(a) Immunostained image of GFP<sup>+</sup> cells with luminal (K19)- and basal (K14)-specific epithelial markers in a pubescent 5 week old gland (representative of n = 3 mice and 5 fields per tissue section); scale bar = 25  $\mu$ m. (b) Representative FACS plots of GFP<sup>+</sup> and tdTomato<sup>+</sup> cells in mammary subsets from pubescent mice (n = 3 mice). (c) Native GFP and tdTomato fluorescence of a prepubescent ductal tip in a wholemount (top) and immunostained image of GFP<sup>+</sup> cells with epithelial markers in prepubescent 2 week old mammary tissue (bottom); scale bar = 10 $\mu$ m (whole mount) and 25  $\mu$ m (tissue section); representative of n = 3 individual mice. (d) Representative FACS plots of mammary subsets from prepubescent mice (n = 3). GFP<sup>+</sup> cells with epithelial keratins in the primitive gland at embryonic day 18 (e) or day 13 (f) (n = 3 mice per stage); scale bar = 25  $\mu$ m. White arrowheads indicate GFP<sup>+</sup> cells that are K19<sup>+</sup> or K14<sup>+</sup>.

# Joshi et al Supplementary Figure 4

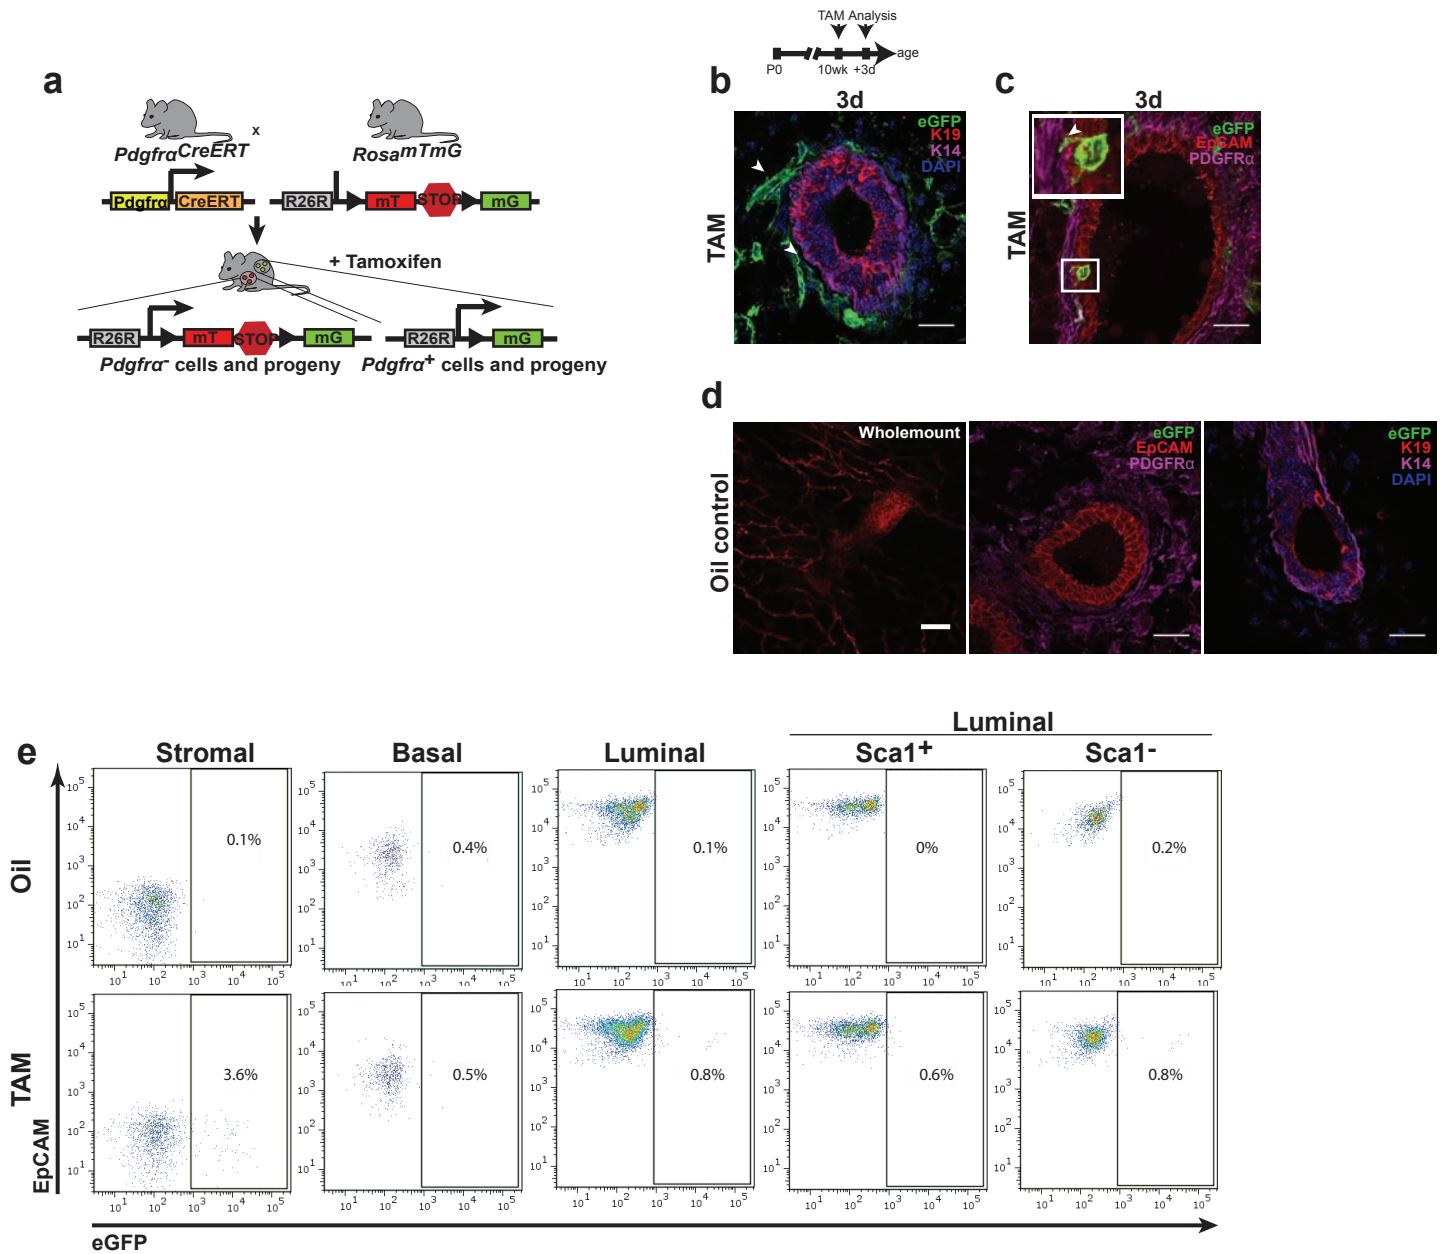

**Inducible tracing of *Pdgfra*<sup>+</sup> cells in the adult mammary gland.** (a) A tamoxifen-inducible lineage tracing model driven by the *Pdgfra* promoter. (b) Mammary tissue section after a 3d short trace following Tamoxifen (TAM) induction and immunostained for GFP with epithelial keratins showing stromal restriction of GFP<sup>+</sup> cells (representative of *n* = 3 mice and 5 fields per tissue section). (c) Rare GFP<sup>+</sup> cells that have entered the epithelial space but still in contact with PDGFRα<sup>+</sup> stroma; scale bar = 25 μm for (b,c). (d) Wholemount (scale bar = 50 μm) and immunofluorescent images (middle and right; scale bar = 25 μm) of GFP, PDGFRα and epithelial markers (EpCAM, K19-Luminal, K14-basal) in tissue sections from oil injected controls. (e) FACS plots of GFP-labelled cells within mammary subsets after the 3d trace (representative of *n* = 3 mice).

# Joshi et al Supplementary Figure 5

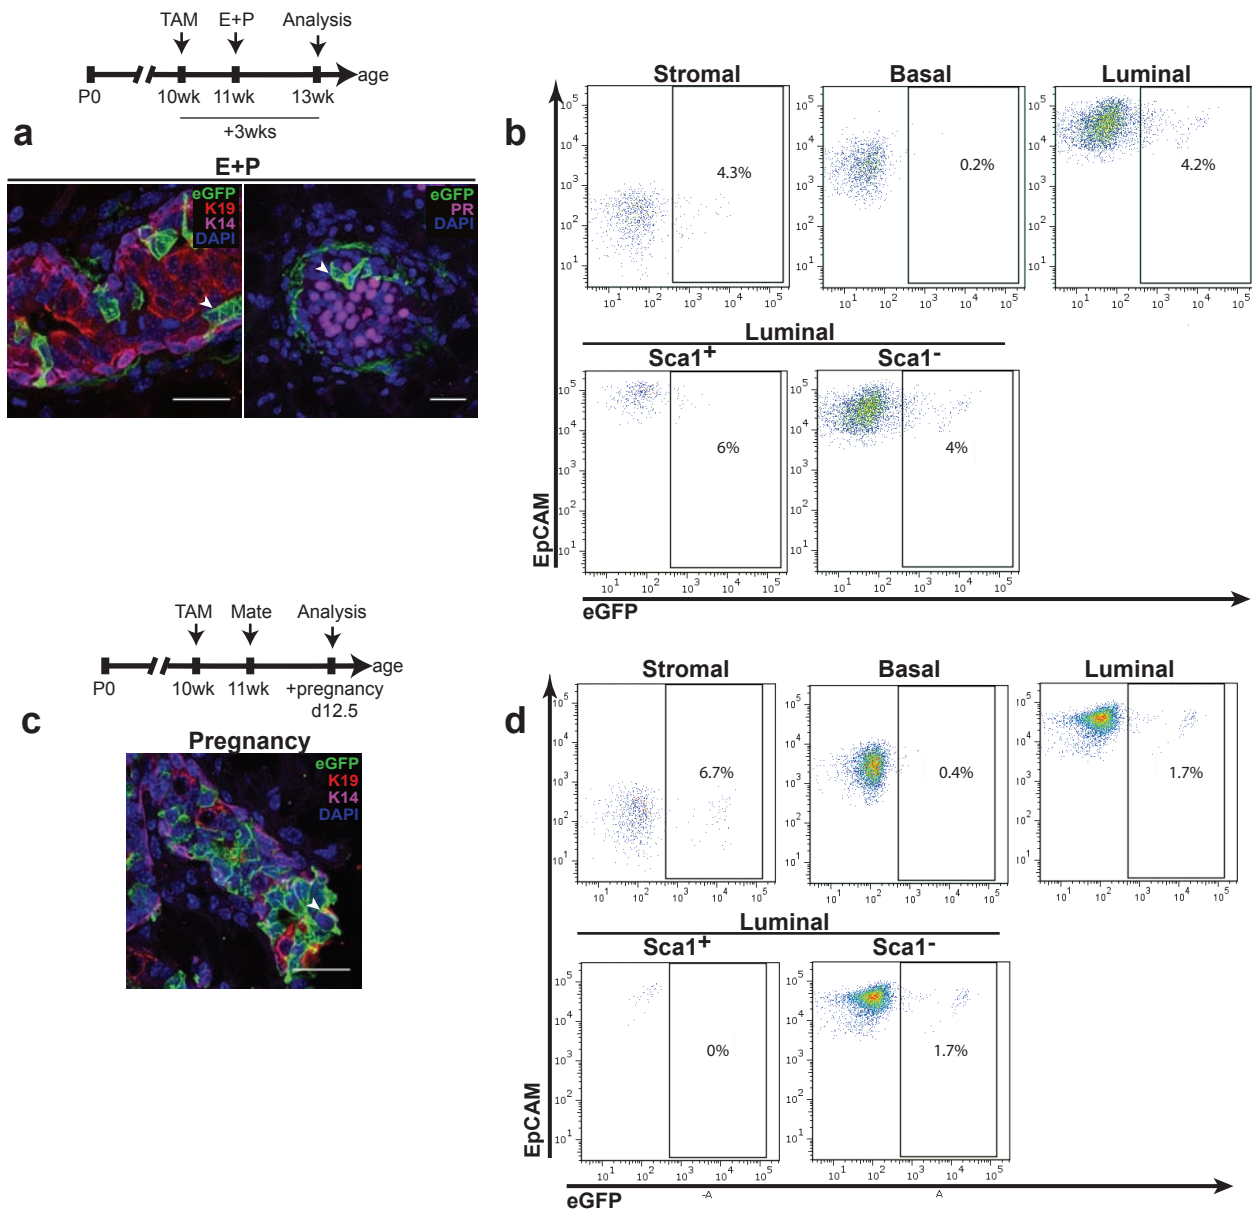

**GFP-labelled cells following Cre induction in adult *PdgfraCreERT R26mTmG* glands participate in epithelial expansion driven by hormones and pregnancy.** (a) Immunofluorescent images of GFP with epithelial Keratins (left) and Progesterone receptor (PR; right) after a three week trace following TAM induction and hormone stimulation (representative of  $n = 3$  mice and 5 fields per tissue section); scale bar = 25  $\mu$ m. (b) Representative FACS plots of GFP<sup>+</sup> cells within mammary subpopulations after hormone stimulation. (c) Image of GFP<sup>+</sup> cells with epithelial Keratins in adult mammary tissue during pregnancy (representative of  $n = 3$  mice and 5 fields per tissue section); scale bar = 25  $\mu$ m. (d) FACS plots of GFP<sup>+</sup> cells in mammary subpopulations after cell tracing during pregnancy.

# Joshi et al Supplementary Figure 6

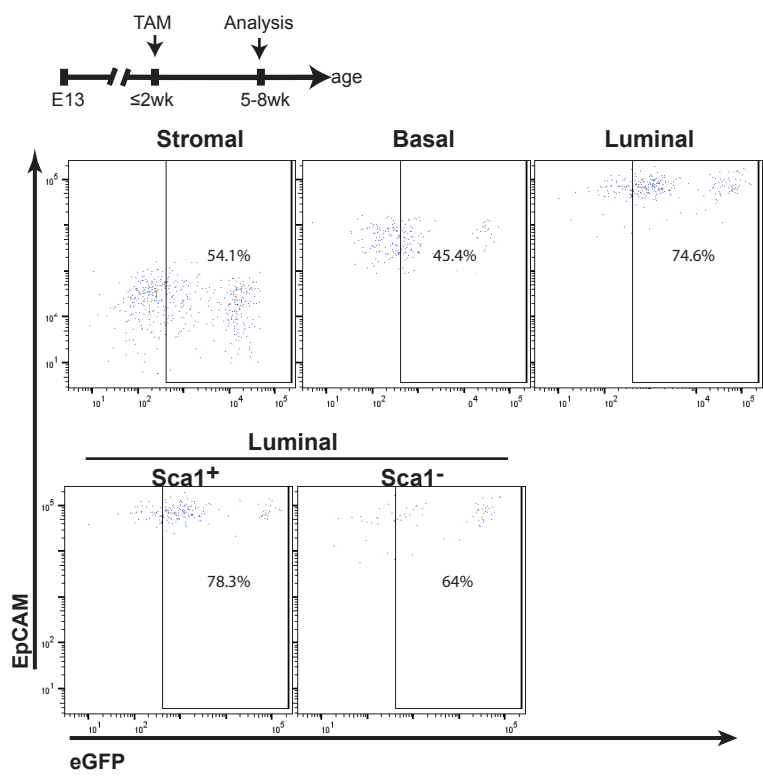

**GFP+ cells following Cre induction in prepubescent *PdgfraCreERT R26mTmG* mice.**  
FACS plots of GFP+ cells in different mammary subsets following early labelling (n = 3 individual mice).

# Joshi et al Supplementary Figure 7

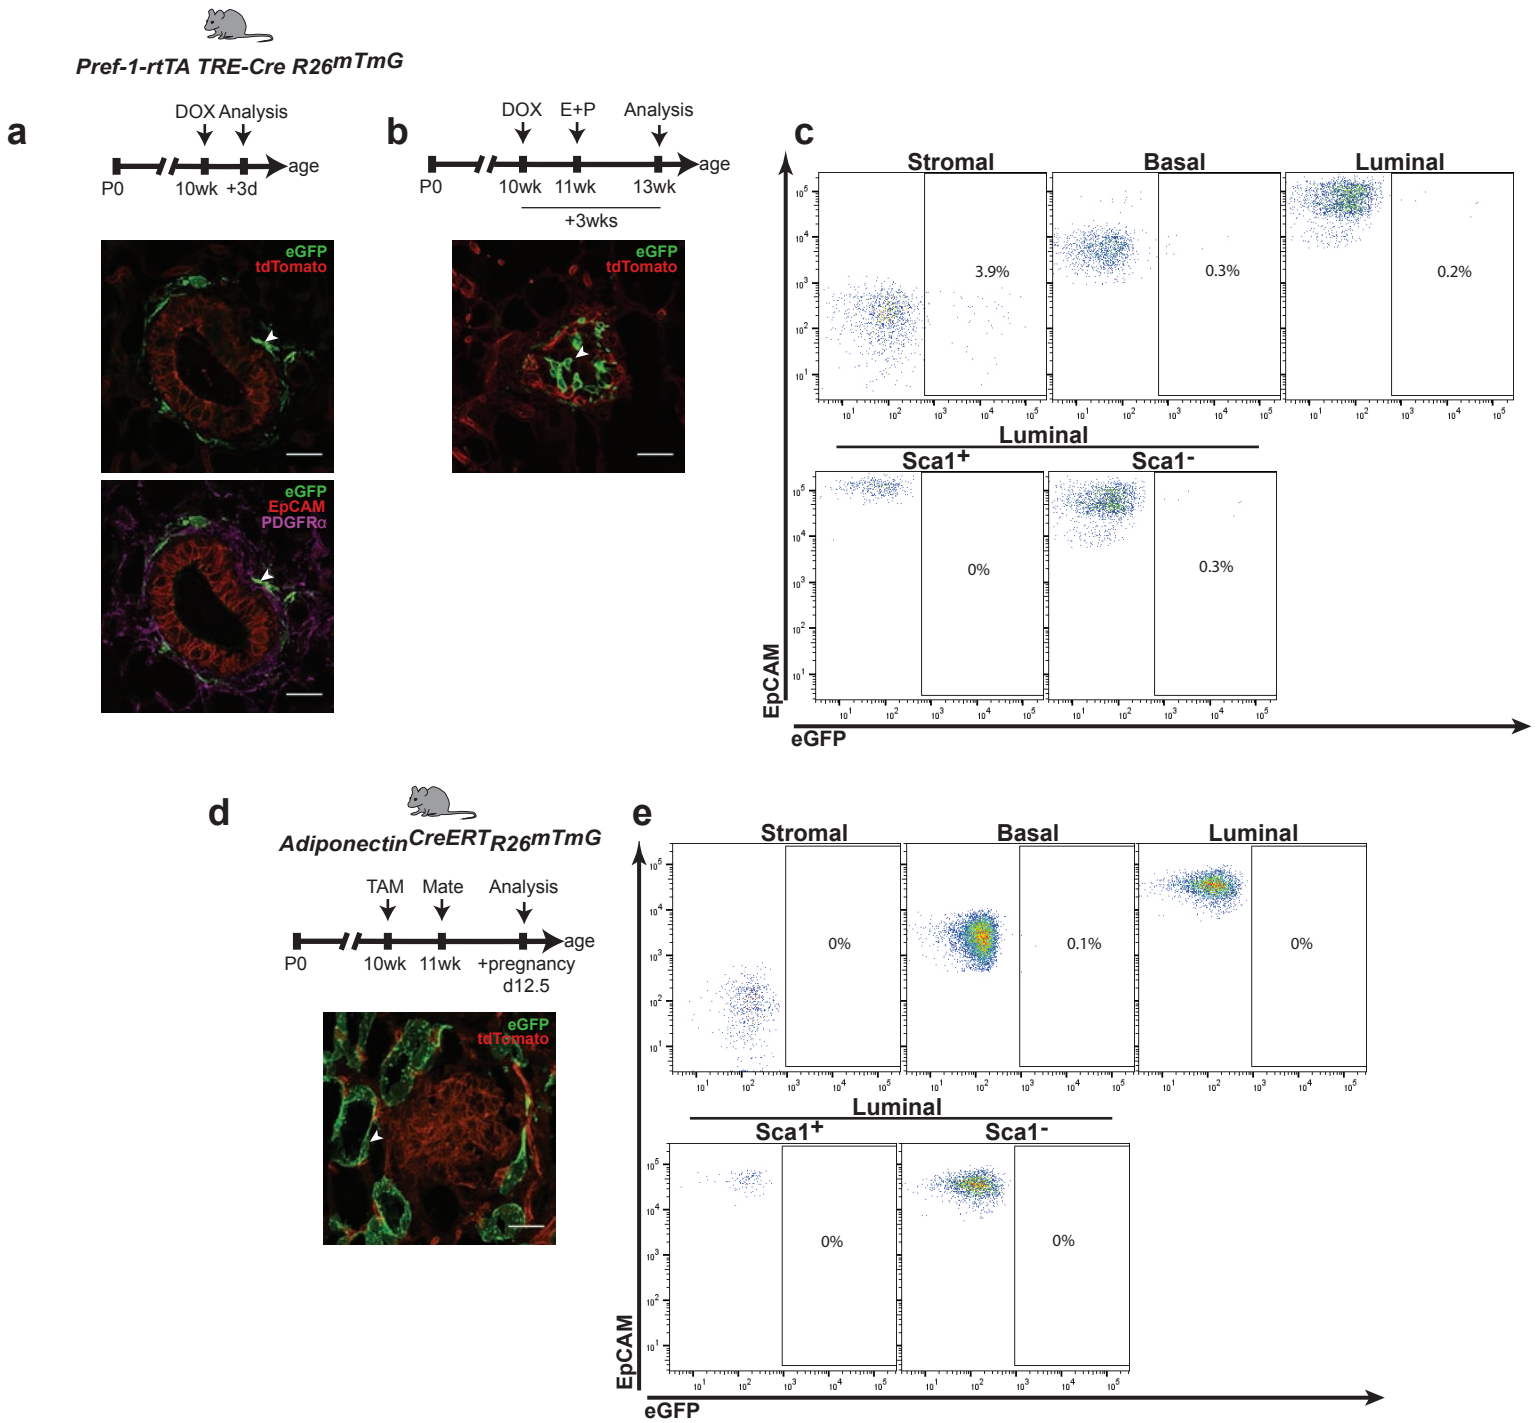

## Adipocyte progenitors but not mature adipocytes are recruited into the adult mammary epithelium.

(a) Immunofluorescent images of GFP-labelled cells with tdTomato (top), EpCAM and PDGFR $\alpha$  (bottom) in mammary tissue sections derived from *Pref-1* lineage tracing mice 3 days following doxycycline (DOX) induction (representative of  $n = 2$  mice and 5 fields per tissue section). (b) GFP-labelled cells in *Pref-1* mice are found in the mammary epithelium following a 3 week trace involving hormone stimulation (representative of  $n = 3$  mice and 5 fields per tissue section). (c) Representative FACS plots of GFP<sup>+</sup> cell distribution in mammary subpopulations after hormone stimulation ( $n = 3$  mice). (d,e) Immunostaining and flow cytometry analysis show that GFP-labelled cells in *Adiponectin* lineage tracing mice remain restricted to adipocytes during pregnancy (representative of  $n = 3$  mice). Arrowheads indicate GFP<sup>+</sup> cells; Scale bar = 25  $\mu$ m in (a,b,d).

## Joshi et al Supplementary Figure 8

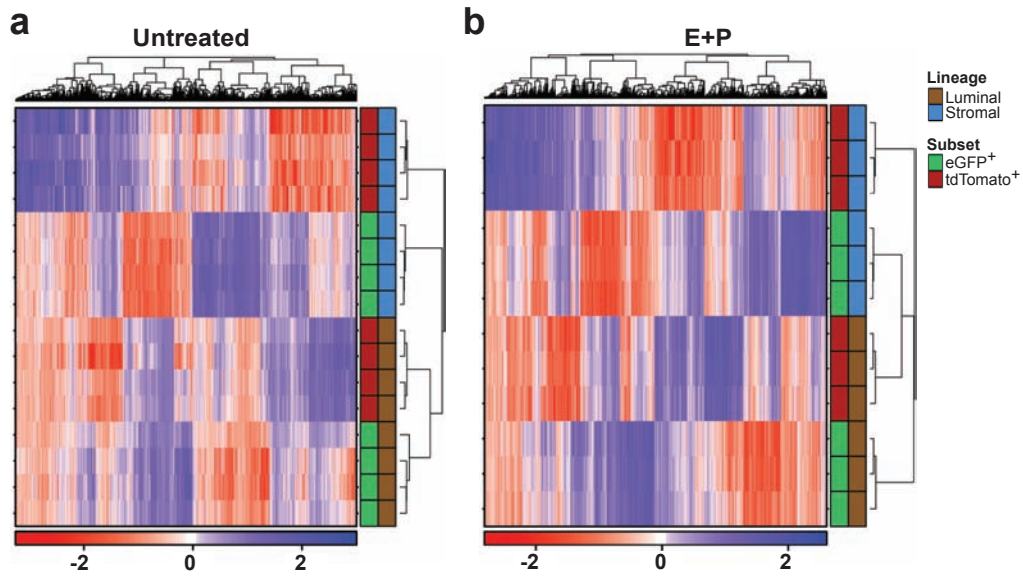

**RNA-seq analysis of eGFP<sup>+</sup> vs. tdTomato<sup>+</sup> cells from *PdgfraCre R26mTmG* mammary glands.**  
(a,b) Heat maps showing clustering of differentially expressed genes between eGFP<sup>+</sup> and tdTomato<sup>+</sup> cell populations in stromal and luminal compartments from untreated and E+P-stimulated mice (n = 4 untreated and n = 3 E+P treated mice). Source data are available as a Source Data file.

## Joshi et al Supplementary Table 1

### Primers and probes for droplet digital PCR

| Oligo           | Sequence                  | Fluor/Quencher |
|-----------------|---------------------------|----------------|
| <i>Gapdh</i> F  | AGGTTGTCTCCTGCGACT        |                |
| <i>Gapdh</i> R  | TGCTGTAGCCGTATTCATTGTCA   |                |
| <i>Gapdh</i> P  | ACTCCCACTCTTCCACCTTCGATGC | FAM/ZEN/BHQ1   |
| <i>Pdgfra</i> F | TGCAGTTGCCTTACGACTCCA     |                |
| <i>Pdgfra</i> R | CCATAAGCTGTACCTTCGACC     |                |
| <i>Pdgfra</i> P | CGACCAAGCACGAGGCCATCTCT   | HEX/ZEN/BHQ2   |
| <i>K18</i> F    | CCGCCTTGCCGCCGATG         |                |
| <i>K18</i> R    | CTACCACCTTGCGGAGTCCAT     |                |
| <i>K18</i> P    | CGCTCTCCACAGACTGGCGCAT    | HEX/ZEN/BHQ2   |
| <i>K14</i> F    | ATTCTCCTCTGGCTCTCAGTC     |                |
| <i>K14</i> R    | TGGAGACCACCTTGCCAT        |                |
| <i>K14</i> P    | CCTCCACCAACCGCCAGATCCGC   | FAM/ZEN/BHQ1   |
